# Supplementary material
Source: MDPI journal article supplement (https://www.mdpi.com/2071-1050/13/1/41)
Supplement: s1 [file s1]

**Table S1.** Collinearity effects between variables used in the predictive model.

|               | <b>Slope</b> | <b>FMS</b> | <b>Bio1</b> | <b>Bio4</b> | <b>Bio12</b> | <b>Bio15</b> |
|---------------|--------------|------------|-------------|-------------|--------------|--------------|
| <b>Slope</b>  | 1.000        |            |             |             |              |              |
| <b>FMS</b>    | -0.269       | 1.000      |             |             |              |              |
| <b>Bio1</b>   | -0.397       | 0.188      | 1.000       |             |              |              |
| <b>Bio4</b>   | 0.075        | 0.008      | -0.274      | 1.000       |              |              |
| <b>Bio12</b>  | 0.164        | -0.201     | -0.293      | -0.488      | 1.000        |              |
| <b>Bio 15</b> | 0.067        | -0.009     | 0.631       | -0.628      | 0.408        | 1.000        |

**Table S2.** List of the proposed corridors that make up the network. Suitability: suitability value for the distribution of Iberian lynx obtained through the suitability map generated by the species distribution model; Length: length of the corridor (km); mean width: average width of the corridor; minimum width: minimum width of the corridor; Below threshold: sum of the lengths of segments of the corridor with width below the threshold and proportion of the corridor below the threshold width. Threshold = 1500 m. value from which a narrowing, strangling or bottleneck in the corridor is considered. In red: extreme upper values; in green: extreme lower values.

| <b>Corridor</b> | <b>Suitability (%)</b> | <b>Length (km)</b> | <b>Average width (km)</b> | <b>Minimum width (km)</b> | <b>Below threshold (km)</b> | <b>Below threshold (%)</b> |
|-----------------|------------------------|--------------------|---------------------------|---------------------------|-----------------------------|----------------------------|
| 1-2             | 42.7                   | 70.3               | 3.0                       | 1.0                       | 4.8                         | 6.8                        |
| 2-11            | 29.8                   | 61.7               | 3.8                       | 2.6                       | 0.0                         | 0.0                        |
| 2-3             | 34.5                   | 72.1               | 1.2                       | 0.3                       | 52.7                        | 73.1                       |
| 2-4             | 41.9                   | 128.8              | 3.1                       | 0.8                       | 9.5                         | 7.3                        |
| 3-10            | 42.7                   | 104.8              | 2.9                       | 0.2                       | 4.3                         | 4.1                        |
| 3-8             | 54.2                   | 71.5               | 5.0                       | 2.5                       | 0.0                         | 0.0                        |
| 3-9             | 43.6                   | 55.0               | 4.3                       | 2.4                       | 0                           | 0                          |
| 4-14            | 77.6                   | 84.4               | 4.5                       | 1.9                       | 0.0                         | 0.0                        |
| 4-19            | 70.2                   | 17.0               | 11.5                      | 4.5                       | 0.0                         | 0.0                        |
| 4-3             | 49.6                   | 76.7               | 3.0                       | 0.9                       | 11.5                        | 15.0                       |
| 4-5             | 55.7                   | 64.6               | 3.2                       | 1.3                       | 5.7                         | 8.8                        |
| 5-3             | 61.2                   | 75.4               | 3.3                       | 0.8                       | 2.4                         | 3.2                        |
| 6-10            | 59.6                   | 65.1               | 3.1                       | 1.2                       | 2.3                         | 3.6                        |
| 6-19            | 68.2                   | 76.7               | 2.5                       | 0.2                       | 10.4                        | 13.5                       |
| 6-5             | 75.5                   | 24.5               | 4.4                       | 2.7                       | 0.0                         | 0.0                        |
| 6-7             | 47.7                   | 38.5               | 3.4                       | 0.9                       | 4.7                         | 12.3                       |
| 6-8             | 52.8                   | 66.4               | 3.1                       | 1.3                       | 0.8                         | 1.2                        |
| 13-12           | 39.1                   | 168.5              | 2.6                       | 0.2                       | 33.8                        | 20.1                       |
| 13-14           | 61.7                   | 113.0              | 3.8                       | 1.3                       | 2.0                         | 1.8                        |
| 13-15           | 71.6                   | 109.7              | 2.3                       | 0.8                       | 13.5                        | 12.3                       |
| 13-4            | 52.7                   | 91.1               | 4.5                       | 1.7                       | 0.0                         | 0.0                        |
| 14-16           | 66.5                   | 136.1              | 2.1                       | 0.2                       | 25.3                        | 18.6                       |
| 15-12           | 44.4                   | 87.7               | 3.3                       | 0.9                       | 4.0                         | 4.6                        |
| 15-14           | 72.4                   | 140.1              | 2.4                       | 0.7                       | 17.0                        | 12.1                       |
| 15-17           | 59.9                   | 61.2               | 3.1                       | 1.7                       | 0.0                         | 0.0                        |
| 15-18           | 65.5                   | 91.5               | 3.1                       | 1.3                       | 0.8                         | 0.9                        |
| 17-16           | 75.7                   | 24.4               | 5.2                       | 3.3                       | 0.0                         | 0.0                        |
| 17-18           | 41.7                   | 11.5               | 12.6                      | 11.4                      | 0.0                         | 0.0                        |
| 18-12           | 47.1                   | 109.7              | 2.8                       | 0.2                       | 9.4                         | 8.6                        |

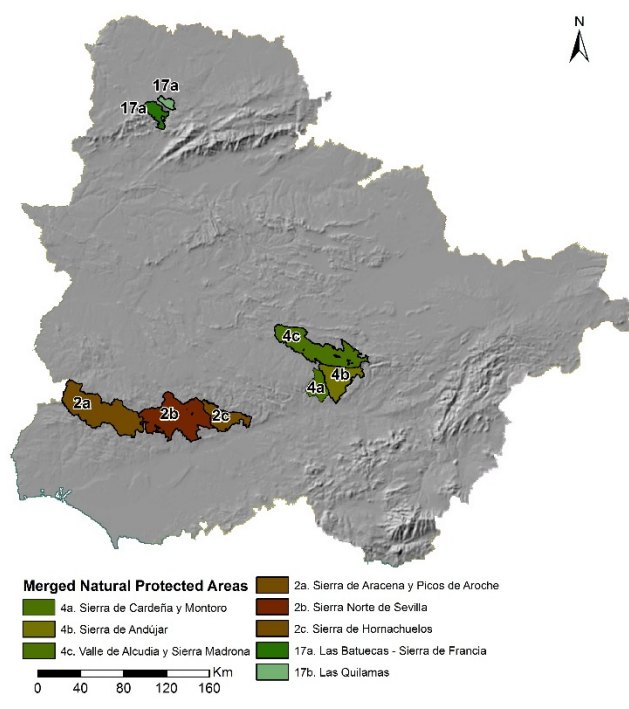

**Figure S1.** Merged natural protected areas. Eight natural areas that are to be considered as three core areas.
